# Supplementary material for: Global phylogenomic analyses of Mycobacterium abscessus provide context for non cystic fibrosis infections and the evolution of antibiotic resistance
Source: PubMed Central journal article supplement (PMC8390669; doi:10.1038/s41467-021-25484-9), 2021-08-26
Supplement: 41467_2021_25484_MOESM1_ESM.pdf [file 41467_2021_25484_MOESM1_ESM.pdf]

**Supplementary Information for:**

**Title:** Global phylogenomic analyses of *Mycobacterium abscessus* provide context for non cystic fibrosis infections and the evolution of antibiotic resistance

**Authors:** Ryan A. Bronson, BS<sup>1</sup>, Chhavi Gupta, PhD<sup>2</sup>, Abigail L. Manson, PhD<sup>1</sup>, Jan A. Nguyen<sup>2</sup>, MS, Asli Bahadirli-Talbott, MS<sup>2</sup>, Nicole M. Parrish, PhD<sup>3</sup>, Ashlee M. Earl, PhD<sup>1\*</sup> and Keira A. Cohen, MD<sup>2\*</sup>

**Affiliations:**

<sup>1</sup>Infectious Disease and Microbiome Program, Broad Institute of MIT and Harvard

<sup>2</sup>Division of Pulmonary and Critical Care Medicine, Johns Hopkins University School of Medicine

<sup>3</sup>Department of Pathology, Johns Hopkins University School of Medicine

\*These last authors contributed equally.

**Corresponding Author:**

Keira A. Cohen, MD

Assistant Professor of Medicine

Division of Pulmonary and Critical Care Medicine

Johns Hopkins University School of Medicine

1830 E. Monument St., 5<sup>th</sup> Floor

Baltimore, MD, 21287

E-mail: kcohen8@jhmi.edu

## Supplementary Note 1

### **Known drug resistance mechanisms explain the majority of phenotypic resistance to clarithromycin and amikacin**

In order to validate use of phenotype/genotype investigations of resistance in these subspecies, we first performed phenotypic drug susceptibility testing (DST) by minimum inhibitory concentration (MIC) determination for clarithromycin and amikacin for the 30 MAB clinical isolates that were newly sequenced for this study (**Methods**). Among the 30 phenotyped strains with high quality genomic data, we observed higher clarithromycin MICs among the 20 *M. abscessus* isolates relative to the ten *M. massiliense*, as expected (**Supplementary Figures 5a-b**). On day 3 of clarithromycin MIC testing, only 60% (12/20) of *M. abscessus* isolates had high-level phenotypic resistance (MIC  $\geq$  8 $\mu$ g/mL) to clarithromycin, but this increased to 90% (18/20) on day 14, indicative of inducible macrolide resistance <sup>26</sup>. For *M. massiliense*, no isolates were found to have high-level clarithromycin resistance on day 3, however, 3/10 isolates had an MIC = 8 $\mu$ g/mL on day 14.

Most observed resistance to clarithromycin could be explained by known genetic determinants (**Methods; Supplementary Table 4**), with overall sensitivity and specificity for prediction of clarithromycin resistance of 80.1% and 100%, respectively. For these isolates, constitutive resistance to clarithromycin in MAB was attributed to mutations in the 23S rRNA gene *rrl* <sup>23,25</sup>, whereas inducible resistance was mediated by *erm(41)* <sup>26</sup> (**Table 1**).

Only a single isolate of *M. abscessus* contained a resistance mutation in *rrl* with the canonical A2271G (A2059G in *E. coli* numbering) variant <sup>23,25</sup>, and had a corresponding high-level of resistance to clarithromycin (MIC > 16 $\mu$ g/mL) (**Supplementary Figures 5c-d**). As expected, 100% (17/17) of *M. abscessus* with a wildtype (T28) *erm(41)* exhibited high-level phenotypic resistance to clarithromycin. The remaining three *M. abscessus* isolates contained a T28C *erm(41)* variant <sup>26,27</sup>, which renders *erm(41)* non-functional, and confers susceptibility to macrolides. Two of these three isolates had lower MICs to clarithromycin, whereas one isolate was phenotypically resistant, with an MIC of 16 $\mu$ g/mL, suggesting involvement of alternate resistance mechanism for clarithromycin, as has been suggested by other studies <sup>21</sup>.

For *M. massiliense*, a known 276-bp deletion in *erm(41)*, which has been shown to confer susceptibility to clarithromycin <sup>26–28</sup>, was identified in all *M. massiliense* isolates. All 10 of the *M. massiliense* isolates in our dataset had lower day 14 MICs to clarithromycin, when compared to *M. abscessus* with WT *erm*. We did not observe any *rrl* variants in this subspecies.

With respect to amikacin resistance, five (16.6%) of the 30 isolates exhibited phenotypic resistance to amikacin (MIC  $\geq$  64 $\mu$ g/mL) (**Supplementary Figures 5e-f**). The overall sensitivity and specificity for prediction of amikacin resistance based on known genetic features were 80% and 100%, respectively. The five resistant isolates were all *M. abscessus* and represent specimens from three different patients (three isolates from a single patient, and two isolates from two different patients; together, 11% of patients). The three resistant isolates from the same individual, and an isolate from a second individual each contained the previously identified canonical *rrs* A1374G (A1408G in *E. coli* nomenclature) variant that confers high-level amikacin resistance <sup>24</sup>. However, a resistant isolate from the third person—which had MIC testing performed a total of five times to confirm phenotype—did not contain any known resistance markers for amikacin (**Supplementary Table 5**), suggesting that alternative resistance mechanisms to amikacin remain undiscovered.

## Supplementary Figures

**Supplementary Figure 1. *M. boletii* isolates in our dataset were only sampled from cystic fibrosis patients.** Single-copy core phylogenetic trees of 30 isolates of *M. boletii*, all from CF patients from Bryant et al <sup>14</sup>. **a)** Country of origin for each isolate. **b)** Drug resistance predictions. **c)** Clusters of isolates with core SNP distance < 500 are indicated with alternating grayscale arcs on the circle (**Methods**). No cluster included sufficient members to be considered dominant circulating clones based on our definition.

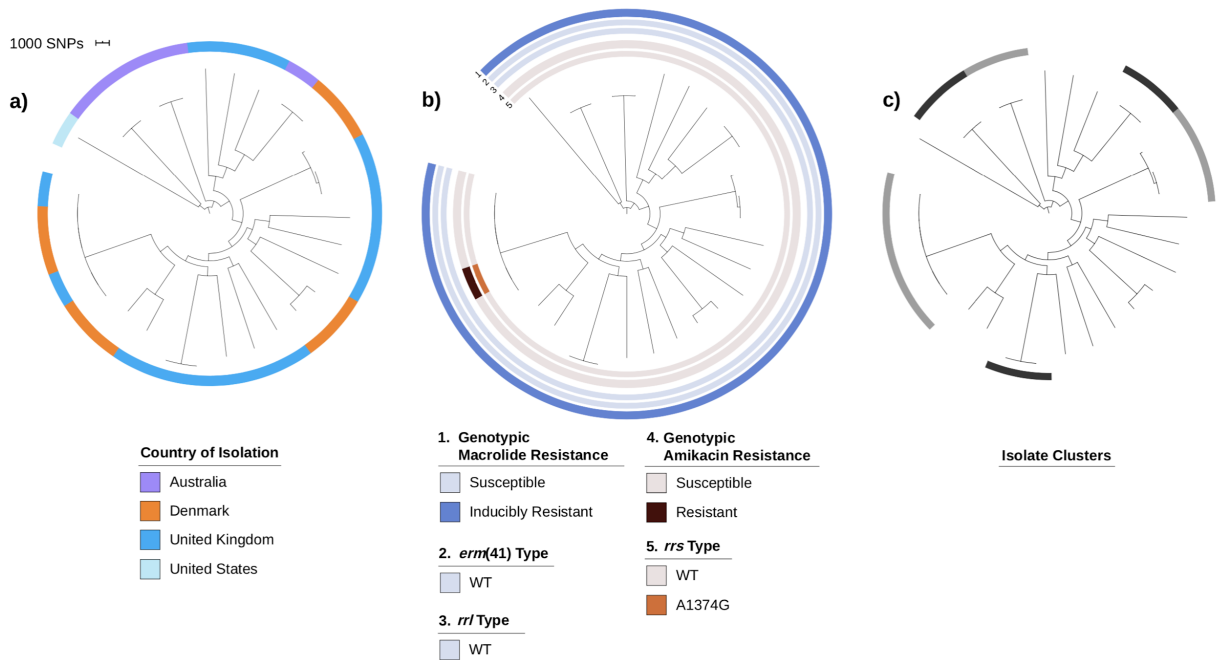

**Supplementary Figure 2. Clustering by core SNPs revealed extensive clustering and global, dominant circulating clones.** Clusters, calculated using hierarchical clustering with a 500 core SNP distance threshold (Methods), are indicated with alternating grayscale arcs on the circle for **a) *M. massiliense*** and **b) *M. abscessus***. Isolates connected with a grey arc correspond to those falling within the 500 SNP threshold. DCCs, containing at least 10 isolates from more than one country, are labeled and numbered in descending order of size. DCCs A1, A2 and M1 corresponded to *M. abscessus* clusters 1 and 2, and *M. massiliense* cluster 1, respectively, from Bryant et al.

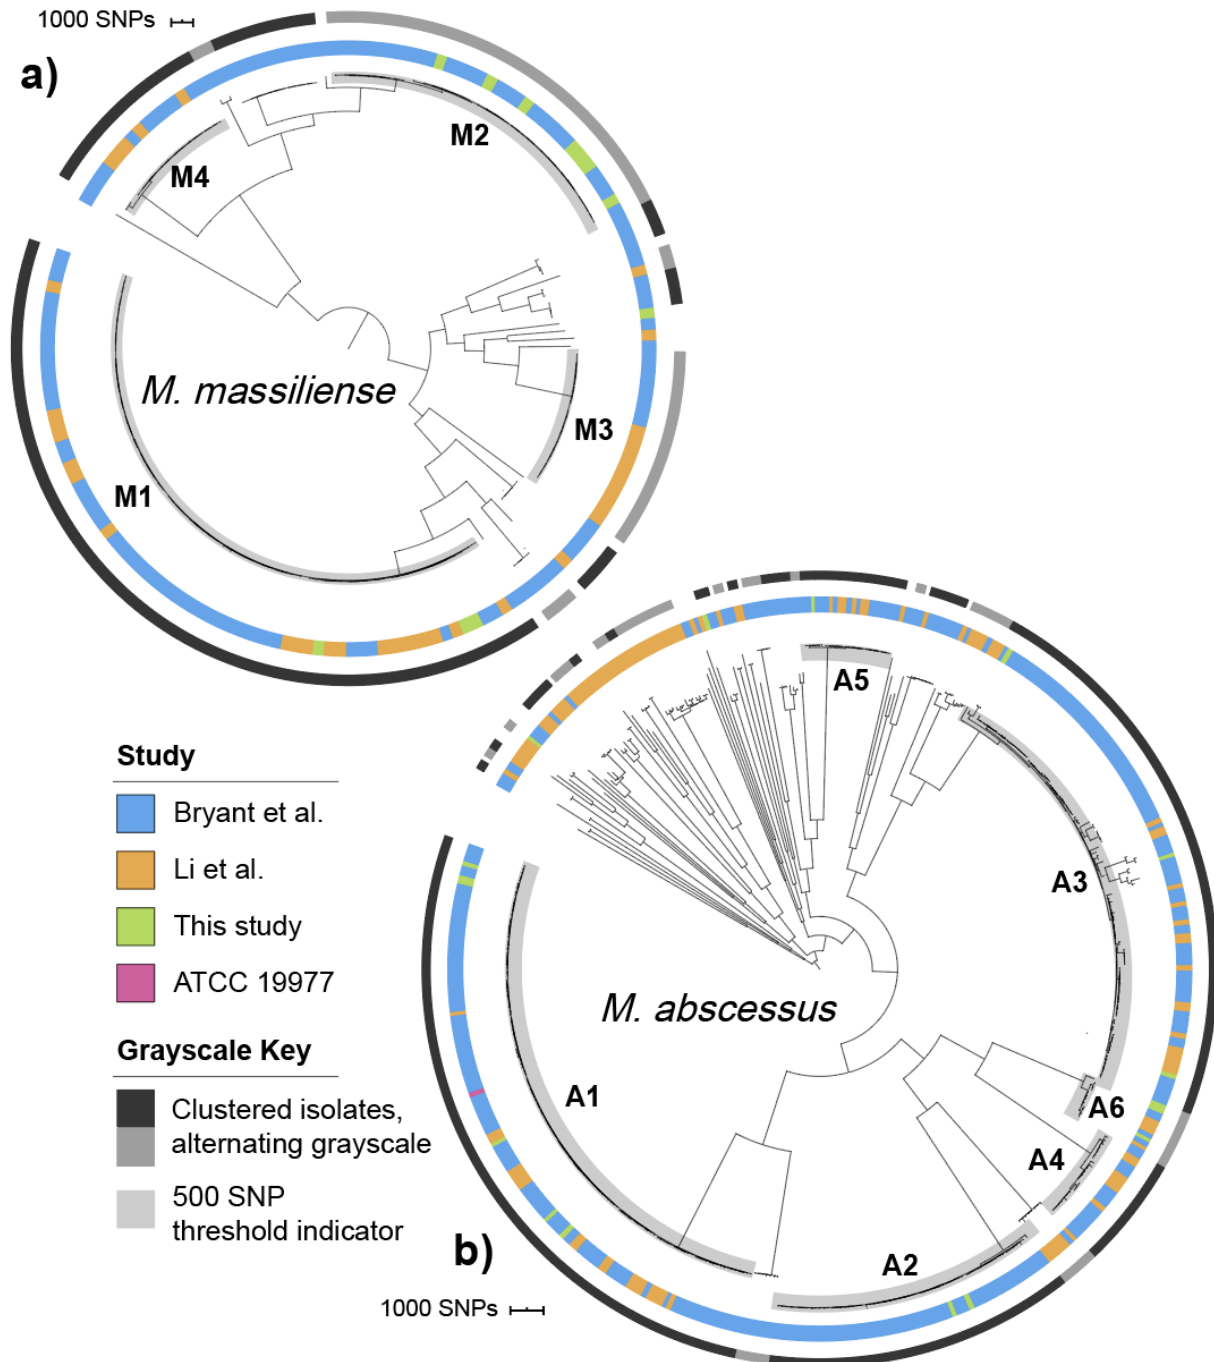

**Supplementary Figure 3. Individual phylogenies for each DCC confirm nesting of CF and non-CF isolates.** These higher resolution trees were constructed using the same methods as the subspecies-specific trees. Country of isolation and host CF-status are shown for each isolate.

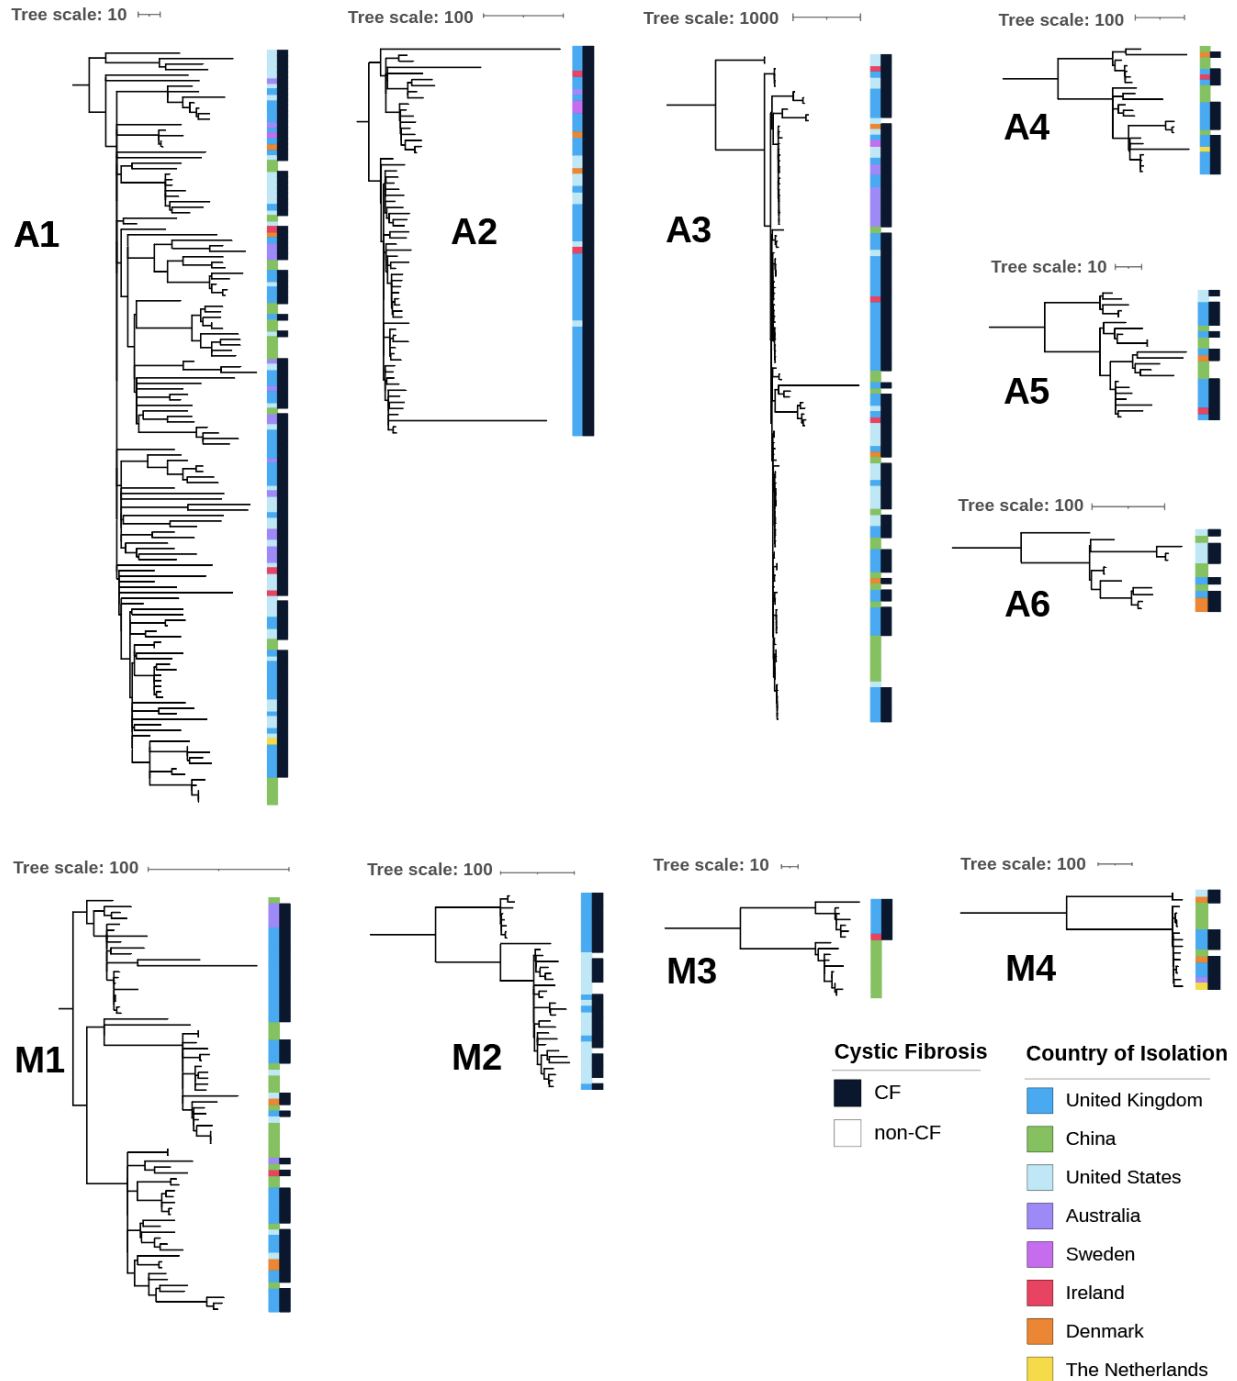

**Supplementary Figure 4. Pairwise SNPs distinguished within-patient isolate pairs from between-patient isolate pairs.** Precision and recall were calculated for different pairwise SNP thresholds (blue dots) for classification of within-patient isolate pairs in **a) *M. abscessus*** and **b) *M. massiliense***. The no skill performance (the performance of a random classifier, which corresponds to the fraction of true positive samples in the dataset) is indicated by the yellow dashed lines. Thresholds for every increment of 5 are indicated in black. We chose the threshold that maximized F1 score (20 SNPs for *M. abscessus* and 15 SNPs for *M. massiliense*, corresponding to F1 scores of 0.87 and 0.72, respectively).

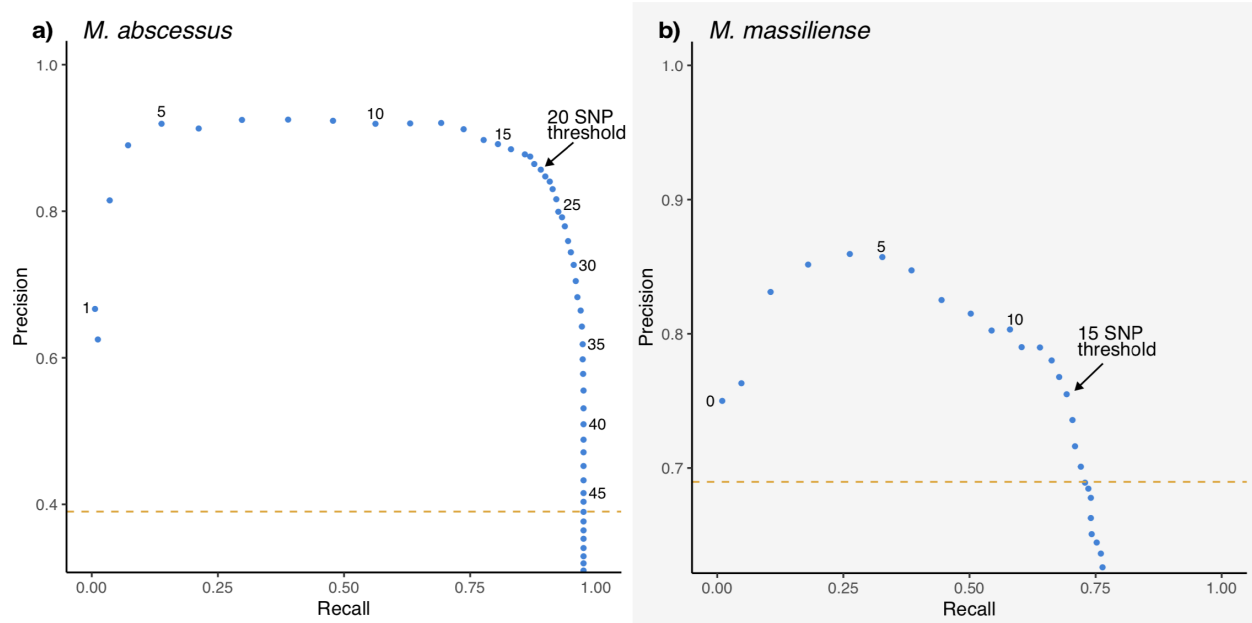

**Supplementary Figure 5. MIC determination for clarithromycin and amikacin.** A total of 30 newly sequenced clinical isolates of MAB (20 *M. abscessus* and 10 *M. massiliense*) underwent MIC determination to clarithromycin and amikacin. **a)** day 3 drug susceptibility for clarithromycin by MAB subspecies, **b)** day 14 drug susceptibility for clarithromycin by MAB subspecies, **c)** day 3 drug susceptibility for clarithromycin by genotype, **d)** day 3 drug susceptibility for clarithromycin by genotype, **e)** day 3 drug susceptibility for amikacin by MAB subspecies, **f)** day 3 drug susceptibility for amikacin by genotype.

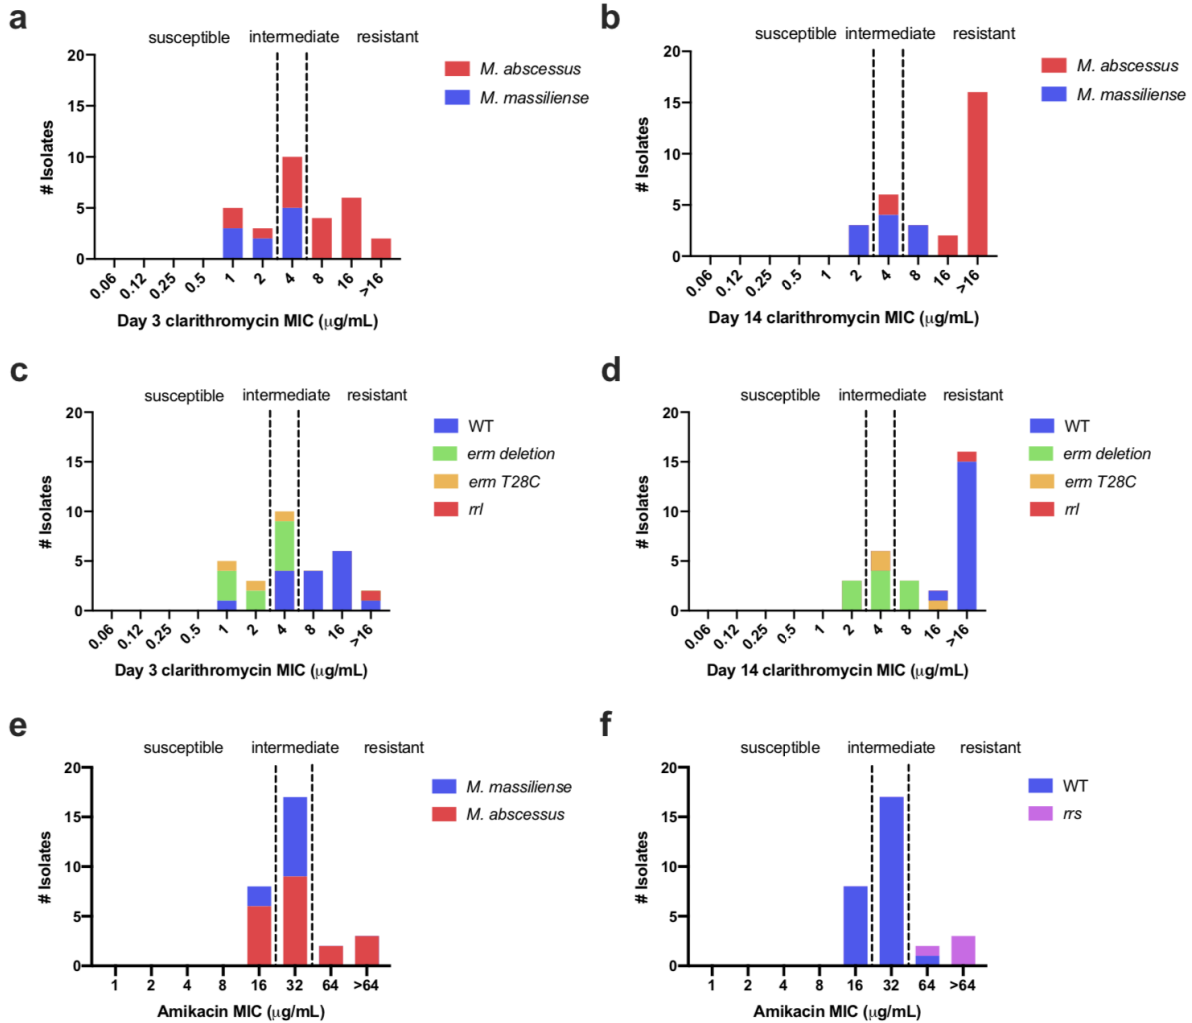

## Supplementary Tables

**Supplementary Table 1.** Datasets included, by isolate and patient.

| <b>a)</b>       | <b>Number of isolates by study*</b>                                           |                       |                    |         |                                      |                                      |
|-----------------|-------------------------------------------------------------------------------|-----------------------|--------------------|---------|--------------------------------------|--------------------------------------|
| study           | <i>M. abscessus</i>                                                           | <i>M. massiliense</i> | <i>M. bolletii</i> | mixed** | Total number of isolates represented | Total number of patients represented |
| Newly sequenced | 20                                                                            | 10                    | 0                  | 0       | 30                                   | 27                                   |
| Bryant          | 736                                                                           | 256                   | 91                 | 3       | 1086                                 | 500                                  |
| Li              | 124                                                                           | 38                    | 0                  | 0       | 162                                  | 162                                  |
| Total           | 880                                                                           | 304                   | 91                 | 3       | 1278                                 | 689                                  |
| <b>b)</b>       | <b>Number of unique patient isolates, excluding low-quality assemblies***</b> |                       |                    |         |                                      |                                      |
| study           | <i>M. abscessus</i>                                                           | <i>M. massiliense</i> | <i>M. bolletii</i> | mixed   | Total number of isolates represented | Total number of patients represented |
| Newly sequenced | 17                                                                            | 10                    | 0                  | 0       | 27                                   | 27                                   |
| Bryant          | 356                                                                           | 123                   | 30                 | 0       | 509                                  | 498                                  |
| Li              | 121                                                                           | 38                    | 0                  | 0       | 159                                  | 159                                  |
| Total           | 494                                                                           | 171                   | 30                 | 0       | 695                                  | 684                                  |

\* We selected one isolate per subspecies per patient from each longitudinal series. Thus, for the Bryant subset, the number of strains can exceed the number of patients

\*\* Samples identified as mixed by Bryant et al. are indicated here. Samples identified as mixed from among the newly sequenced isolates were removed from all analyses and are not listed in this table (see Methods).

\*\*\* All assemblies with greater than 100 scaffolds were removed from further analysis



**Supplementary Table 2.** Newly sequenced MAB isolates with sample identification, BioProject and accession numbers, subspecies, host CF status, median MICs for amikacin and clarithromycin (day 3 and day 14), and presence of drug resistance mutations.

| Sample Name                 | BioProject  | Accession    | Subspecies  | Host CF-status | Amikacin MIC | Clari MIC (d 3) | Clari MIC (d 14) | <i>erm</i> | <i>rpl</i> | <i>rrs</i> |
|-----------------------------|-------------|--------------|-------------|----------------|--------------|-----------------|------------------|------------|------------|------------|
| JHN_AB_0001_1A              | PRJNA523365 | SAMN11100994 | abscessus   | non-CF         | 32           | 8               | >16              |            |            |            |
| JHN_AB_0002_1               | PRJNA523365 | SAMN11100987 | massiliense | non-CF         | 16           | 1               | 1.5              | deletion   |            |            |
| JHN_AB_0003_1               | PRJNA523365 | SAMN11100988 | abscessus   | CF             | 16           | >16             | >16              |            | A2271N     |            |
| JHN_AB_0004_1B <sup>1</sup> | PRJNA523365 | SAMN11100989 | abscessus   | CF             | 16           | 5               | >16              |            |            |            |
| JHN_AB_0004_2               | PRJNA523365 | SAMN11100991 | abscessus   | CF             | 32           | 8               | >16              |            |            |            |
| JHN_AB_0005_2               | PRJNA523365 | SAMN11100995 | abscessus   | CF             | 64           | 8               | >16              |            |            | A1374N     |
| JHN_AB_0006_2               | PRJNA523365 | SAMN11101019 | abscessus   | CF             | >64          | 16              | >16              |            |            | A1374N     |
| JHN_AB_0006_3               | PRJNA523365 | SAMN11101018 | abscessus   | CF             | >64          | 16              | >16              |            |            | A1374N     |
| JHN_AB_0006_4               | PRJNA523365 | SAMN11100998 | abscessus   | CF             | >64          | 16              | >16              |            |            | A1374N     |
| JHN_AB_0008_1               | PRJNA523365 | SAMN11101013 | abscessus   | CF             | 32           | 4               | >16              |            |            |            |
| JHN_AB_0009_1               | PRJNA523365 | SAMN11100992 | abscessus   | non-CF         | 32           | 4               | >16              |            |            |            |
| JHN_AB_0010_1               | PRJNA523365 | SAMN11100993 | abscessus   | non-CF         | 24           | 1.5             | 5                | T28C       |            |            |
| JHN_AB_0013_1               | PRJNA523365 | SAMN11100996 | massiliense | CF             | 24           | 1.5             | 2                | deletion   |            |            |
| JHN_AB_0016_1               | PRJNA523365 | SAMN11100999 | abscessus   | CF             | 24           | 8               | >16              |            |            |            |
| JHN_AB_0017_1               | PRJNA523365 | SAMN11101000 | abscessus   | non-CF         | 16           | 1.25            | >16              |            |            |            |
| JHN_AB_0018_1               | PRJNA523365 | SAMN11101001 | abscessus   | CF             | 64           | 16              | >16              |            |            |            |
| JHN_AB_0019_1               | PRJNA523365 | SAMN11101002 | massiliense | non-CF         | 32           | 3               | 8                | deletion   |            |            |
| JHN_AB_0020_1               | PRJNA523365 | SAMN11101003 | massiliense | non-CF         | 32           | 4               | 6                | deletion   |            |            |
| JHN_AB_0021_1               | PRJNA523365 | SAMN11101004 | abscessus   | CF             | 32           | 3               | 16               | T28C       |            |            |
| JHN_AB_0022_1               | PRJNA523365 | SAMN11101005 | massiliense | CF             | 30           | 1.25            | 2                | deletion   |            |            |
| JHN_AB_0023_1               | PRJNA523365 | SAMN11101006 | massiliense | non-CF         | 32           | 1.5             | 8                | deletion   |            |            |
| JHN_AB_0024_1               | PRJNA523365 | SAMN11101007 | massiliense | non-CF         | 32           | 1               | 4                | deletion   |            |            |
| JHN_AB_0025_1               | PRJNA523365 | SAMN11101008 | abscessus   | CF             | 32           | >16             | >16              |            |            |            |
| JHN_AB_0027_1               | PRJNA523365 | SAMN11101010 | abscessus   | CF             | 16           | 1               | 4                | T28C       |            |            |
| JHN_AB_0028_1               | PRJNA523365 | SAMN11101011 | massiliense | non-CF         | 32           | 4               | 10               | deletion   |            |            |
| JHN_AB_0031_1               | PRJNA523365 | SAMN11101014 | abscessus   | CF             | 48           | 6               | 16               |            |            |            |
| JHN_AB_0032_1               | PRJNA523365 | SAMN11101015 | massiliense | non-CF         | 32           | 4               | 4                | deletion   |            |            |
| JHN_AB_0033_1               | PRJNA523365 | SAMN11101016 | massiliense | non-CF         | 16           | 4               | 4                | deletion   |            |            |
| JHN_AB_0034_1               | PRJNA523365 | SAMN11101017 | abscessus   | non-CF         | 16           | 16              | >16              |            |            |            |
| JHN_AB_0037_1               | PRJNA523365 | SAMN11101020 | abscessus   | CF             | 16           | 12              | >16              |            |            |            |
| JHN_AB_19977                | PRJNA523365 | SAMN11100986 | abscessus   | non-CF         |              |                 |                  |            |            |            |

<sup>1</sup>Shaded rows indicate isolates that derived from the same person at different timepoints.

**Supplementary Table 3.** Dominant circulating clones were globally distributed.

| Clone <sup>1</sup> | Subspecies         | Count <sup>2</sup> | SNP range <sup>3</sup> | Countries where isolates originated                             |
|--------------------|--------------------|--------------------|------------------------|-----------------------------------------------------------------|
| A1                 | <i>abscessus</i>   | 137                | 0-94                   | Australia, China, Denmark, Ireland, Netherlands, Sweden, UK, US |
| A3                 | <i>abscessus</i>   | 116                | 0-219                  | Australia, China, Denmark, Ireland, Sweden, UK, US              |
| A2                 | <i>abscessus</i>   | 64                 | 8-85                   | Australia, Denmark, Ireland, Sweden, UK, US                     |
| A4                 | <i>abscessus</i>   | 23                 | 8-145                  | China, Denmark, Ireland, Netherlands, UK, US                    |
| A5                 | <i>abscessus</i>   | 22                 | 1-50                   | China, Denmark, Ireland, UK, US                                 |
| A6                 | <i>abscessus</i>   | 11                 | 3-95                   | China, Denmark, UK, US                                          |
| M1                 | <i>massiliense</i> | 70                 | 0-60                   | Australia, China, Denmark, Ireland, UK, US                      |
| M2                 | <i>massiliense</i> | 33                 | 3-55                   | UK, US                                                          |
| M3                 | <i>massiliense</i> | 17                 | 0-43                   | China, Ireland, UK                                              |
| M4                 | <i>massiliense</i> | 15                 | 1-67                   | Australia, China, Denmark, Netherlands, UK, US                  |

<sup>1</sup>DCC (**Figure 1**)

<sup>2</sup>Number of isolates within the DCC

<sup>3</sup>Range of SNPs between pairwise combinations of isolates within this DCC

**Supplementary Table 4.** All closely-related pairs of MAB isolates that were separated by fewer pairwise SNPs than our subspecies-specific SNP thresholds and were unlikely to be epidemiologically linked (different CF-status and/or country of isolation).

| Isolate 1 <sup>1</sup> | Isolate 2 <sup>1</sup> | Subspecies       | Pairwise SNPs <sup>2</sup> | Isolate 1 CF-status <sup>3</sup> | Isolate 2 CF-status | Isolate 1 country <sup>4</sup> | Isolate 2 country | DCC <sup>3</sup> |
|------------------------|------------------------|------------------|----------------------------|----------------------------------|---------------------|--------------------------------|-------------------|------------------|
| 10702_1_3              | 10250_1_13             | <i>abscessus</i> | 6                          | CF                               | CF                  | Denmark                        | United Kingdom    | A1               |
| 10702_1_3              | 10665_4_36             | <i>abscessus</i> | 9                          | CF                               | CF                  | Denmark                        | United Kingdom    | A1               |
| 12163_2_18             | 10465_1_61             | <i>abscessus</i> | 9                          | CF                               | CF                  | United Kingdom                 | United States     | A1               |
| 12163_2_16             | ASM280061v1            | <i>abscessus</i> | 10                         | CF                               | non-CF              | United Kingdom                 | China             | A4               |
| 12163_2_51             | 10465_1_61             | <i>abscessus</i> | 10                         | CF                               | CF                  | United Kingdom                 | United States     | A1               |
| 11893_6_53             | 10665_4_49             | <i>abscessus</i> | 13                         | CF                               | CF                  | Ireland                        | United Kingdom    | A5               |
| JHN_AB_0017_1          | 10660_1_17             | <i>abscessus</i> | 13                         | non-CF                           | CF                  | United States                  | United States     | A5               |
| 10208_3_59             | ASM280068v1            | <i>abscessus</i> | 13                         | CF                               | non-CF              | United Kingdom                 | China             | A4               |
| 10660_1_6              | 10660_1_22             | <i>abscessus</i> | 13                         | CF                               | CF                  | United States                  | United Kingdom    | A1               |
| 12163_2_56             | 11893_6_53             | <i>abscessus</i> | 14                         | CF                               | CF                  | United Kingdom                 | Ireland           | A5               |
| ASM280081v1            | 10208_3_63             | <i>abscessus</i> | 14                         | non-CF                           | CF                  | China                          | United Kingdom    | A5               |
| ASM280096v1            | 10208_3_63             | <i>abscessus</i> | 14                         | non-CF                           | CF                  | China                          | United Kingdom    | A5               |
| 12163_2_1              | JHN_AB_0017_1          | <i>abscessus</i> | 14                         | CF                               | non-CF              | United Kingdom                 | United States     | A5               |
| 12163_2_2              | JHN_AB_0017_1          | <i>abscessus</i> | 14                         | CF                               | non-CF              | United Kingdom                 | United States     | A5               |
| 10465_1_59             | 10660_1_22             | <i>abscessus</i> | 14                         | CF                               | CF                  | United States                  | United Kingdom    | A1               |
| 12163_2_47             | ASM280046v1            | <i>abscessus</i> | 14                         | CF                               | non-CF              | United Kingdom                 | China             | A1               |
| 10208_3_63             | ASM280084v1            | <i>abscessus</i> | 15                         | CF                               | non-CF              | United Kingdom                 | China             | A5               |
| 10665_4_36             | 12082_5_83             | <i>abscessus</i> | 15                         | CF                               | CF                  | United Kingdom                 | Sweden            | A1               |
| 12163_2_2              | 10660_1_17             | <i>abscessus</i> | 16                         | CF                               | CF                  | United Kingdom                 | United States     | A5               |
| 10208_3_59             | 10625_5_4              | <i>abscessus</i> | 16                         | CF                               | CF                  | United Kingdom                 | Ireland           | A4               |
| 10702_1_3              | 12082_5_83             | <i>abscessus</i> | 16                         | CF                               | CF                  | Denmark                        | Sweden            | A1               |
| 10702_1_86             | 10660_1_22             | <i>abscessus</i> | 16                         | CF                               | CF                  | United States                  | United Kingdom    | A1               |
| 12163_2_1              | 10660_1_17             | <i>abscessus</i> | 17                         | CF                               | CF                  | United Kingdom                 | United States     | A5               |
| 10702_1_26             | 10660_1_22             | <i>abscessus</i> | 17                         | CF                               | CF                  | United States                  | United Kingdom    | A1               |
| 11893_6_53             | 12163_1_95             | <i>abscessus</i> | 18                         | CF                               | CF                  | Ireland                        | United Kingdom    | A5               |
| 10208_3_61             | 11893_6_53             | <i>abscessus</i> | 19                         | CF                               | CF                  | United Kingdom                 | Ireland           | A5               |
| 11893_6_53             | 12082_5_69             | <i>abscessus</i> | 19                         | CF                               | CF                  | Ireland                        | United Kingdom    | A5               |
| 10625_4_20             | JHN_AB_0017_1          | <i>abscessus</i> | 19                         | CF                               | non-CF              | United Kingdom                 | United States     | A5               |
| 12163_2_47             | ASM280070v1            | <i>abscessus</i> | 19                         | CF                               | non-CF              | United Kingdom                 | China             | A1               |
| 12163_2_47             | ASM280062v1            | <i>abscessus</i> | 19                         | CF                               | non-CF              | United Kingdom                 | China             | A1               |
| 12082_5_80             | ASM280204v1            | <i>abscessus</i> | 20                         | CF                               | non-CF              | United Kingdom                 | China             | A1               |
| 10660_1_35             | 10660_1_22             | <i>abscessus</i> | 20                         | CF                               | CF                  | United States                  | United Kingdom    | A1               |
| 10660_1_13             | 10660_1_22             | <i>abscessus</i> | 20                         | CF                               | CF                  | United States                  | United Kingdom    | A1               |
| 10625_4_8              | 10465_1_55             | <i>abscessus</i> | 20                         | CF                               | CF                  | United Kingdom                 | United States     | A1               |
| 10465_1_61             | 12082_5_68             | <i>abscessus</i> | 20                         | CF                               | CF                  | United States                  | United Kingdom    | A1               |

|               |             |                    |    |        |        |                |                |    |
|---------------|-------------|--------------------|----|--------|--------|----------------|----------------|----|
| 10625_5_30    | 10625_5_8   | <i>massiliense</i> | 7  | CF     | CF     | United Kingdom | Ireland        | M3 |
| JHN_AB_0024_1 | ASM280002v1 | <i>massiliense</i> | 9  | non-CF | non-CF | United States  | China          | M1 |
| JHN_AB_0002_1 | 10208_3_60  | <i>massiliense</i> | 12 | non-CF | CF     | United States  | United Kingdom | M2 |
| 10625_5_8     | 10208_3_3   | <i>massiliense</i> | 13 | CF     | CF     | Ireland        | United Kingdom | M3 |
| JHN_AB_0002_1 | 10702_1_48  | <i>massiliense</i> | 13 | non-CF | CF     | United States  | United States  | M2 |
| JHN_AB_0023_1 | ASM280006v1 | <i>massiliense</i> | 13 | non-CF | non-CF | United States  | China          | M1 |
| JHN_AB_0024_1 | 10250_1_76  | <i>massiliense</i> | 14 | non-CF | CF     | United States  | United Kingdom | M1 |
| JHN_AB_0023_1 | ASM280182v1 | <i>massiliense</i> | 14 | non-CF | non-CF | United States  | China          | M1 |
| 10208_3_58    | 10625_5_8   | <i>massiliense</i> | 15 | CF     | CF     | United Kingdom | Ireland        | M3 |
| 10625_5_8     | 10625_5_27  | <i>massiliense</i> | 15 | CF     | CF     | Ireland        | United Kingdom | M3 |
| JHN_AB_0023_1 | ASM279965v1 | <i>massiliense</i> | 15 | non-CF | non-CF | United States  | China          | M1 |

<sup>1</sup>Identifiers listed correspond to either an assembly accession (“ASM” in isolates from Li et al <sup>17</sup>), isolate codes from this study (“JHN”), or the isolate codes from Bryant et al <sup>14</sup>.

<sup>2</sup>Number of SNPs different in all pairwise alignments of shared orthogroups after removing potential recombination (**Methods**). All pairs below the subspecies-specific SNP thresholds (20 SNPs for *M. abscessus* and below 15 SNPs for *M. massiliense*) are listed here.

<sup>3</sup>Unshaded rows represent isolate pairs that differed by country of isolation.

<sup>4</sup>Shaded rows represent isolate pairs that differed by CF-status as well as country of isolation (with the exception of two rows that only differed by CF-status).

<sup>5</sup>DCCs as listed in **Supplementary Figure 2**

**Supplementary Table 5.** Genotypic resistance definitions for clarithromycin and amikacin.

| <b>Drug</b>    | <b>Phenotype</b>        | <b>MAB numbering</b>                                                                                                                                               | <b><i>E. coli</i> numbering</b>                                                                       |
|----------------|-------------------------|--------------------------------------------------------------------------------------------------------------------------------------------------------------------|-------------------------------------------------------------------------------------------------------|
| Clarithromycin | Constitutive resistance | <i>rrl</i> T371C<br><i>rrl</i> G795A<br><i>rrl</i> A1932G<br><i>rrl</i> A2269G<br><i>rrl</i> A2270N<br><i>rrl</i> A2271N<br><i>rrl</i> G2281A<br><i>rrl</i> A2293C | <i>rrl</i> A2057N<br><i>rrl</i> A2058N<br><i>rrl</i> A2059N<br><i>rrl</i> G2069A<br><i>rrl</i> A2082C |
|                | Inducible resistance    | WT <i>erm</i> at T28                                                                                                                                               |                                                                                                       |
|                | Susceptible             | <i>erm</i> T28C<br><i>erm</i> deletion                                                                                                                             |                                                                                                       |
| Amikacin       | Constitutive resistance | <i>rrs</i> A1374G                                                                                                                                                  | <i>rrs</i> T1406A<br><i>rrs</i> A1408G<br><i>rrs</i> C1409T                                           |

**Supplementary Table 6.** AMR markers and phenotypic prediction percent by isolate CF-status.

|                                   | % of cystic fibrosis isolates | % of non-cystic fibrosis isolates | Are CF and non-CF significantly different?* |
|-----------------------------------|-------------------------------|-----------------------------------|---------------------------------------------|
| Genotype                          |                               |                                   |                                             |
| <i>rrl</i> variant                | 7.5%                          | 6.9%                              | 1                                           |
| <i>rrl</i> WT                     | 92.5%                         | 93.1%                             |                                             |
| <i>erm</i> (41) deletion          | 23.8%                         | 26.6%                             | 0.4758                                      |
| <i>erm</i> (41) non-truncated     | 76.2%                         | 73.4%                             |                                             |
| <i>erm</i> (41) C28               | 15%                           | 9.8%                              | 0.09744                                     |
| <i>erm</i> (41) T28               | 85%                           | 90.2%                             |                                             |
| <i>rrs</i> variant                | 5.6%                          | 99.4%                             | 0.003858**                                  |
| <i>rrs</i> WT                     | 94.4%                         | 0.6%                              |                                             |
| Predicted phenotype               |                               |                                   |                                             |
| macrolide constitutive resistance | 7.5%                          | 6.9%                              | 0.7847                                      |
| macrolide inducible resistance    | 58.2%                         | 61.3%                             |                                             |
| macrolide susceptible             | 34.4%                         | 31.8%                             |                                             |
| amikacin resistant                | 5.6%                          | 99.4%                             | 0.003858**                                  |
| amikacin susceptible              | 94.4%                         | 0.6%                              |                                             |

\*Significance level comparing CF to non-CF for each row was performed using a two-sided Fisher's exact test. \*\* =  $p \leq 0.01$

**Supplementary Table 7. rRNA SNP frequencies by subspecies.**

|                   | <b>Counts (Frequencies)</b> |                              |                           |
|-------------------|-----------------------------|------------------------------|---------------------------|
| <b>SNP</b>        | <b><i>M. abscessus</i></b>  | <b><i>M. massiliense</i></b> | <b><i>M. bolletii</i></b> |
| <i>rrl</i> G795A  | 5 (1.0%)                    | 0                            | 0                         |
| <i>rrl</i> A2270N | 13 (2.6%)                   | 22 (12.9%)                   | 0                         |
| <i>rrl</i> A2271N | 4 (0.8%)                    | 4 (2.3%)                     | 0                         |
| <i>rrl</i> G2281A | 2 (0.4%)                    | 0                            | 0                         |
| <i>rrl</i> A2293T | 1 (0.1%)                    | 0                            | 0                         |
| <i>rrs</i> A1374G | 20 (4.0%)                   | 9 (5.3%)                     | 1 (3.3%)                  |

**Supplementary Table 8.** GenBank assembly references used for MAB subspecies identification.

| <b>GenBank assembly accession</b> | <b>MAB subspecies</b> |
|-----------------------------------|-----------------------|
| GCA_000069185.1                   | <i>M. abscessus</i>   |
| GCA_001606295.1                   | <i>M. abscessus</i>   |
| GCA_001606315.1                   | <i>M. abscessus</i>   |
| GCA_001606335.1                   | <i>M. abscessus</i>   |
| GCA_001610655.1                   | <i>M. abscessus</i>   |
| GCA_001677155.1                   | <i>M. abscessus</i>   |
| GCA_001677195.1                   | <i>M. abscessus</i>   |
| GCA_000445035.1                   | <i>M. bolletii</i>    |
| GCA_001606195.1                   | <i>M. bolletii</i>    |
| GCA_003609715.1                   | <i>M. bolletii</i>    |
| GCA_000277775.2                   | <i>M. massiliense</i> |
| GCA_000497265.2                   | <i>M. massiliense</i> |
| GCA_001606215.1                   | <i>M. massiliense</i> |
| GCA_001606235.1                   | <i>M. massiliense</i> |
| GCA_001606255.1                   | <i>M. massiliense</i> |
| GCA_001606275.1                   | <i>M. massiliense</i> |
| GCA_001610615.1                   | <i>M. massiliense</i> |
| GCA_001610635.1                   | <i>M. massiliense</i> |
| GCA_001610675.1                   | <i>M. massiliense</i> |
| GCA_001677095.1                   | <i>M. massiliense</i> |
| GCA_001677175.1                   | <i>M. massiliense</i> |
| GCA_001677215.1                   | <i>M. massiliense</i> |
| GCA_002140035.1                   | <i>M. massiliense</i> |
| GCA_004209815.1                   | <i>M. massiliense</i> |
| GCA_004209835.1                   | <i>M. massiliense</i> |
